# Supplementary material for: Resveratrol Oligomers, Plant-Produced Natural Products With Anti-virulence and Plant Immune-Priming Roles
Source: PubMed Central journal article supplement (PMC9197177; doi:10.3389/fpls.2022.885625), 2022-05-27
Supplement: Data_Sheet_1.pdf [file Data_Sheet_1.pdf]

## **Supplementary methods**

### **Bacterial motility**

Overnight cultures of *Pst* DC3000, *Pst*Δ*hrcC* and *Pst* D36E in King'B medium containing 20 g of proteose peptone no.3, 1.5 g of K<sub>2</sub>HPO<sub>4</sub>, 1.5 g of MgSO<sub>4</sub>·7H<sub>2</sub>O, 15 mL of glycerol and 15 g of agar per liter were adjusted 2.0 of optical density at 600 nm. The bacterial suspensions were inoculated onto a motility medium containing 0.5 g of proteose peptone no.3, 0.3 g of yeast extract, and 0.4 g of agar per liter. Hopeaphenol was supplemented into the medium with 100 μM. 48 hours after incubation at 28 °C, the distance of bacterial movement and morphology of bacterial tendrils were observed.

### **ROS burst measurement**

Resveratrol derivatives (resveratrol, ampelisin A, isohopeaphenol, kobophenol A, and hopeaphenol) and sterilized water (mock) were infiltrated into four-weeks-old Arabidopsis leaves at the concentration of 100 μM. 16 hours after infiltration, the leaf disc was cut using no.2 cork borer and was immersed in 96-well white plate containing 200 μL of sterilized water, followed by incubation at room temperature for 3 hours. The water was carefully discarded, and 200 μL of reaction solution containing 100 nM of PAMP (*P. aeruginosa* flg22), 0.2 μM of luminol, and 20 μg mL<sup>-1</sup> of horseradish peroxidase was quickly added to each with leaf disc. ROS production was evaluated by Luminometer (Centro, Berthold, Germany) every 2 min for 1h.

### **Cell death measurement**

Six-week-old *N. benthamiana* plants were pre-treated with sterilized water or 100 μM of hopeaphenol by syringe infiltration. After 16 h, bacterial suspension of *Pst* DC3000 (1 x 10<sup>6</sup> CFU mL<sup>-1</sup>) was infiltrated at the same site treated with water or hopeaphenol. The leaf disc was cut by no.3 cork borer, and 4 leaf discs per each treatment were put into a round bottom plastic tube containing 6 mL of sterilized water 40 hours after infection. The ion conductivity was measured every 2 h by a conductivity meter (VWR, USA). The photo of the representative result was taken 44 hours post-infection.
